# Supplementary material
Source: Springer Nature journal article supplement (https://www.springermedizin.de/resource/supplementary/12885_2013_4474_MOESM5_ESM.pdf/9466512)

**A**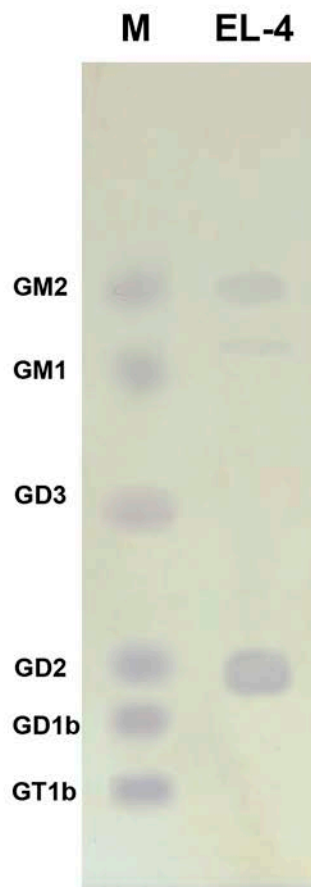**B**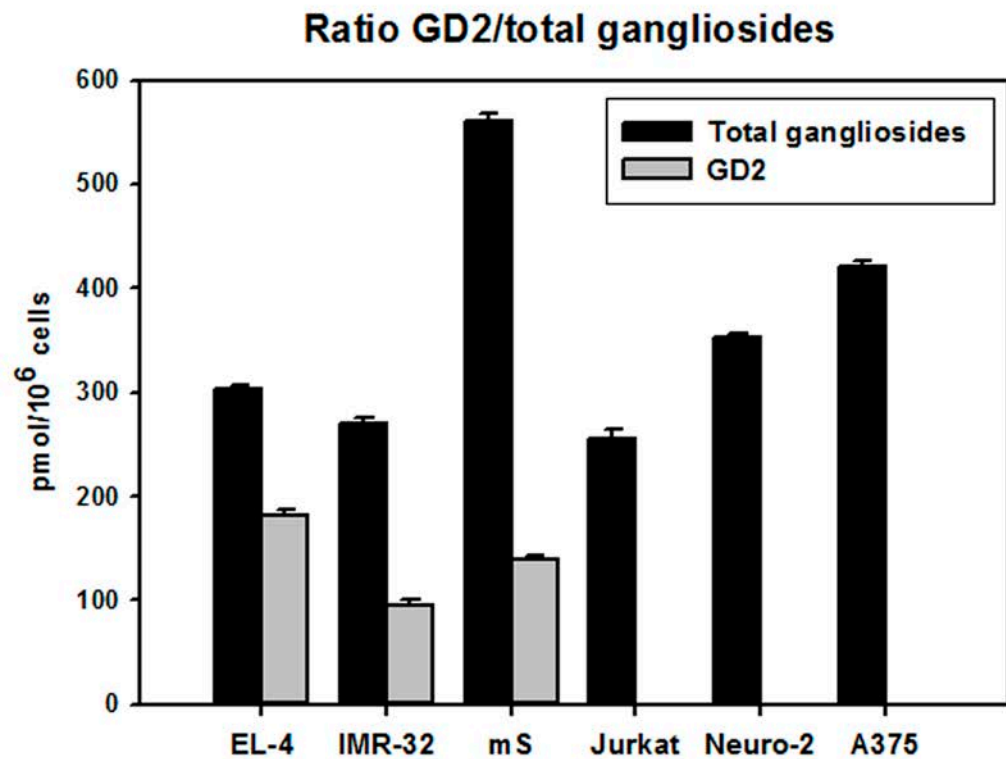

Supplement: MOESM5 [file 9466512]
